# Supplementary material for: The Effectiveness of Nintedanib in Patients with Idiopathic Pulmonary Fibrosis, Familial Pulmonary Fibrosis and Progressive Fibrosing Interstitial Lung Diseases: A Real-World Study
Source: MDPI journal article supplement (doi:10.3390/biomedicines10081973), 2022-08-15
Supplement: s1 [file s1]

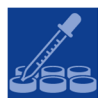

# The effectiveness of nintedanib in patients with idiopathic pulmonary fibrosis, familial pulmonary fibrosis and progressive fibrosing interstitial lung diseases: a real-world study

## Supplementary Materials

**Table S1.** Comparison of annual FVC and DLCO decline rate in the entire study population. \*: paired comparison.

| Parameters               | Pre-treatment | 12-months                             | 24-months      | 36 months      | 48 months    |
|--------------------------|---------------|---------------------------------------|----------------|----------------|--------------|
| N°                       |               |                                       |                |                |              |
| Δ FVC ml                 | 37            | 88                                    | 49             | 24             | 10           |
| p-value                  |               | -123.7 ± 297                          | -156.7 ± 285.8 | -121.5 ± 254.7 | -164.7 ± 200 |
| mean difference (95% CI) | -256 ± 352    | p=0.0374*<br>-133.1 (-258.4 to 7.803) | p=0.5589       | p=0.6598       | p=0.2259     |
| ΔDLCO ml/min/mmHg        |               | -0.27 ± 1.6                           | -0.3 ± 1.1     | -0.42 ± 0.9    | -0.51 ± 2.4  |
| p-value                  | -0.82 ± 1.75  | p=0.0428*                             | p=0.7812       | p=0.8856       | p=0.4967     |
| mean difference (95% CI) |               | -0.55.1 (-1.87 to 0.30)               |                |                |              |
